# Supplementary material for: Understanding the Effect of Energy Density and Formulation Factors on the Printability and Characteristics of SLS Irbesartan Tablets—Application of the Decision Tree Model
Source: MDPI journal article supplement (doi:10.3390/pharmaceutics13111969), 2021-11-20
Supplement: s1 [file s1]

# Supplementary Material: Understanding the Effect of Energy Density and Formulation Factors on Printability and Characteristics of SLS Irbesartan Tablets—Application of Decision Tree Model

Marijana Madžarević, Đorđe Medarević, Stefan Pavlović, Branka Ivković, Jelena Đuriš and Svetlana Ibrić

**Table S1.** Parameters obtained by fitting dissolution data to various mathematical models.

| Formulation | Zero order |        | First order |        | <i>Higuchi</i> |               | Korsmeyer – Peppas |               |        |
|-------------|------------|--------|-------------|--------|----------------|---------------|--------------------|---------------|--------|
|             | $k_0$      | $r^2$  | $k_1$       | $r^2$  | $K_h$          | $r^2$         | $k_{kp}$           | $r^2$         | $n$    |
| FH1 P1      | 0.4862     | 0.9343 | 0.0110      | 0.7980 | 7.8185         | <b>0.9586</b> | 4.5082             | 0.8400        | 0.5820 |
| FH1 P2      | 1.0271     | 0.9535 | 0.0170      | 0.8667 | 12.3882        | <b>0.9869</b> | 9.5406             | 0.9763        | 0.5446 |
| FH1 P3      | 0.4172     | 0.9182 | 0.0069      | 0.8367 | 6.8508         | <b>0.9824</b> | 13.6611            | 0.9800        | 0.3867 |
| FH1 P4      | 0.6449     | 0.8921 | 0.0126      | 0.7949 | 9.7870         | <b>0.9521</b> | 5.3460             | 0.9260        | 0.6065 |
| FH2 P1      | 0.4071     | 0.8869 | 0.0083      | 0.7312 | 7.6501         | 0.9695        | 3.9462             | <b>0.9834</b> | 0.6270 |
| FH2 P2      | 0.4019     | 0.9302 | 0.0088      | 0.8003 | 7.4247         | 0.9832        | 3.4393             | <b>0.9852</b> | 0.6326 |
| FH2 P3      | 0.4490     | 0.7960 | 0.0080      | 0.6939 | 7.6428         | 0.9151        | 9.4345             | <b>0.9557</b> | 0.4831 |
| FH3 P1      | 0.7511     | 0.9786 | 0.0145      | 0.8742 | 10.7164        | <b>0.9936</b> | 3.8673             | 0.9898        | 0.6875 |
| FH3 P2      | 0.8809     | 0.8845 | 0.0139      | 0.7972 | 11.6154        | 0.9574        | 9.1708             | <b>0.9696</b> | 0.5586 |
| FH3 P3      | 0.9233     | 0.9356 | 0.0146      | 0.8657 | 11.9677        | <b>0.9786</b> | 8.6389             | 0.9752        | 0.5644 |
| FH3 P4      | 1.0784     | 0.8293 | 0.0142      | 0.7802 | 11.5628        | 0.9192        | 25.7278            | <b>0.9593</b> | 0.3627 |
| FH4 P1      | 0.5637     | 0.9471 | 0.0136      | 0.8166 | 8.9071         | <b>0.9895</b> | 1.9823             | 0.9798        | 0.7819 |
| FH4 P2      | 0.4880     | 0.8656 | 0.0080      | 0.6631 | 8.1420         | 0.9471        | 9.5194             | <b>0.9658</b> | 0.4893 |
| FH4 P3      | 0.6383     | 0.9432 | 0.0124      | 0.8477 | 10.0713        | <b>0.9827</b> | 3.3448             | 0.9792        | 0.6999 |
| FH4 P4      | 0.6318     | 0.8774 | 0.0119      | 0.7690 | 10.1656        | <b>0.9506</b> | 3.7690             | 0.9487        | 0.6915 |
| FH4 P5      | 0.5983     | 0.9528 | 0.0117      | 0.8560 | 9.4157         | <b>0.9875</b> | 3.9047             | 0.9850        | 0.6583 |
| FH4 P6      | 0.5120     | 0.9444 | 0.0087      | 0.8870 | 8.0648         | <b>0.9806</b> | 9.1261             | 0.9792        | 0.4775 |
| FH5 P1      | 0.8591     | 0.9041 | 0.0148      | 0.7786 | 12.6083        | <b>0.9713</b> | 3.8018             | 0.9710        | 0.7404 |
| FH5 P2      | 0.8351     | 0.8821 | 0.0131      | 0.7436 | 12.3433        | <b>0.9612</b> | 5.6359             | 0.9559        | 0.6657 |
| FH6         | 0.3432     | 0.4868 | 0.0038      | 0.4760 | 4.0126         | 0.6417        | 67.4411            | <b>0.7938</b> | 0.1126 |
| FH7 P1      | 0.8743     | 0.9237 | 0.0180      | 0.9061 | 11.3225        | <b>0.9645</b> | 13.2711            | 0.9642        | 0.4722 |
| FH7 P2      | 2.1190     | 0.9810 | 0.0272      | 0.9378 | 16.6109        | 0.9960        | 27.6331            | 0.9964        | 0.3934 |
| FH8 P1      | 1.5629     | 0.9387 | 0.0278      | 0.9317 | 15.9325        | 0.9792        | 19.7032            | <b>0.9823</b> | 0.4678 |
| FH8 P2      | 1.1162     | 0.8977 | 0.0197      | 0.8996 | 11.4342        | 0.9457        | 29.8048            | <b>0.9660</b> | 0.3344 |
| FH8 P3      | 1.4679     | 0.9430 | 0.0283      | 0.9385 | 14.9307        | 0.9795        | 17.5138            | <b>0.9866</b> | 0.4756 |

$k_0$ —zero order rate constant,  $k_1$ —first order rate constant,  $k_h$ —Higuchi dissolution constant,  $k_{kp}$ —Korsmeyer release rate constant,  $r^2$ —coefficient of determination,  $n$ —drug release exponent.
